# Supplementary material for: Recruitment of BAG2 to DNAJ-PKAc scaffolds promotes cell survival and resistance to drug-induced apoptosis in fibrolamellar carcinoma
Source: PubMed Central journal article supplement — Cell Rep. Author manuscript; Available in PMC 2024 Mar 26. (PMC10964278; doi:10.1016/j.celrep.2024.113678), 2024-01-17
Supplement: NIHMS1970883-supplement-1.pdf [file NIHMS1970883-supplement-1.pdf]

**Cell Reports, Volume 43**

**Supplemental information**

**Recruitment of BAG2 to DNAJ-PKAc scaffolds  
promotes cell survival and resistance to  
drug-induced apoptosis in fibrolamellar carcinoma**

**Sophia M. Lauer, Mitchell H. Omar, Martin G. Golkowski, Heidi L. Kenerson, Kyung-Soon Lee, Bryan C. Pascual, Huat C. Lim, Katherine Forbush, F. Donelson Smith, John D. Gordan, Shao-En Ong, Raymond S. Yeung, and John D. Scott**

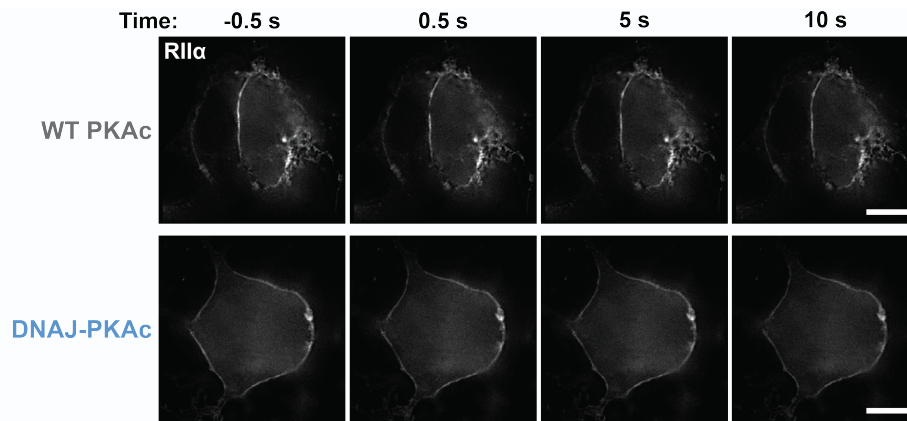

**Figure S1. RII $\alpha$  remains colocalized with membrane-associated AKAP79, related to Figure 2**

Photoactivation timecourses showing RII $\alpha$ -iRFP localization in AML12 hepatocytes expressing AKAP79-GFP, RII $\alpha$ -iRFP, and either WT PKAc (top row) or DNAJ-PKAc (bottom row) tagged with photoactivatable mCherry. Scale bar = 10  $\mu$ m. Data represents 3 experimental replicates.

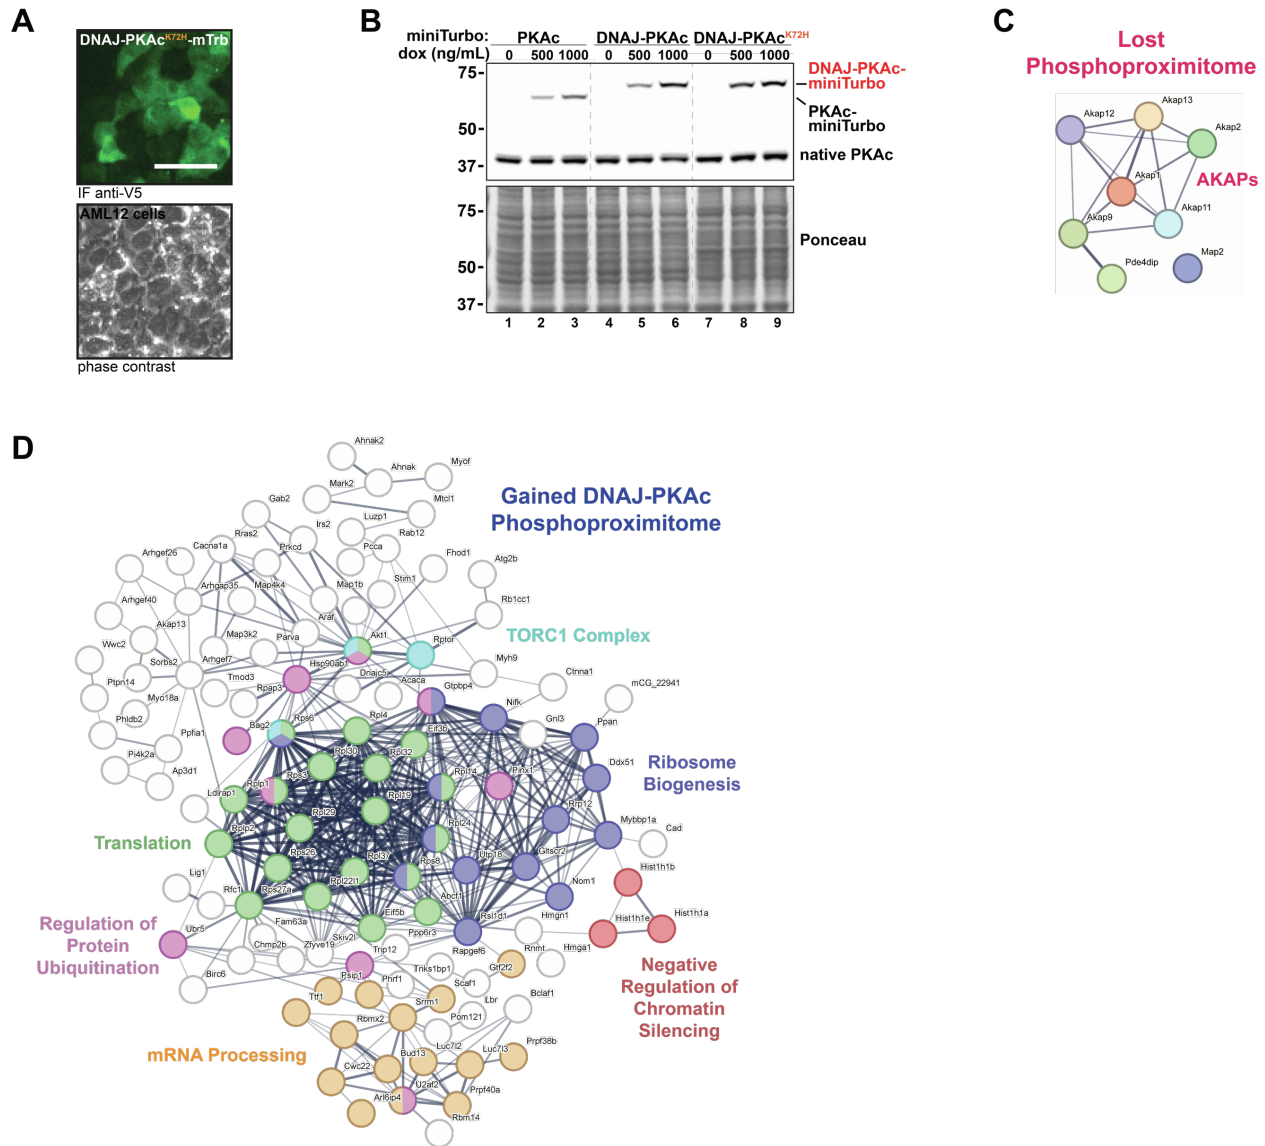

**Figure S2. Proximity phosphoproteomic analysis reveals altered phosphorylation of biological process components in the presence of DNAJ-PKAc, related to Figure 3**

- A) Immunofluorescence imaging of AML12 hepatocytes demonstrating inducible expression of DNAJ-PKAc<sup>K72H</sup>-mTrb (green, top) with corresponding phase contrast (bottom). Scale bar = 50  $\mu$ m.
- B) Immunoblot of cell lysate from AML12 stable lines demonstrating doxycycline-inducible expression of miniTurbo-tagged PKAc variants (top bands) and native PKAc (bottom bands). Dashed line removes lanes from a separate experiment.
- C) STRING network depiction of selected phosphoproteins with lesser enrichment in DNAJ-PKAc versus WT PKAc.
- D) STRING network depiction of selected phosphoproteins with greater enrichment in DNAJ-PKAc versus WT PKAc. Node color corresponds with similarly colored annotation.

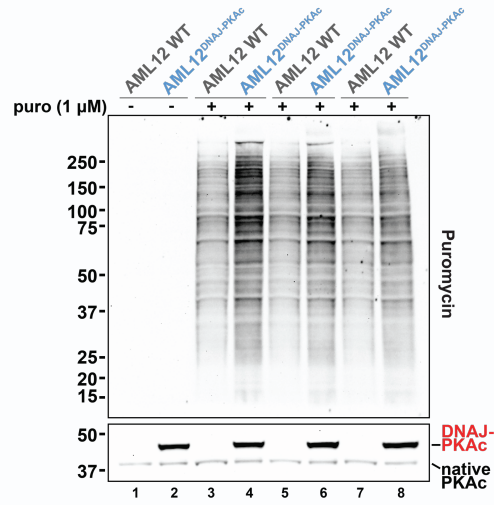

**Figure S3. Cells expressing DNAJ-PKAc exhibit enhanced translation, related to Figure 4**  
 Full immunoblot showing three biological replicates of cell lysates from WT AML12 and AML12<sup>DNAJ-PKAc</sup> treated with either vehicle or puromycin (1 μM). Puromycin conditions in top panel show newly synthesized, puromycin-labeled proteins. PKAc in bottom panel shows expression of DNAJ-PKAc (top band) over native PKAc (bottom band).

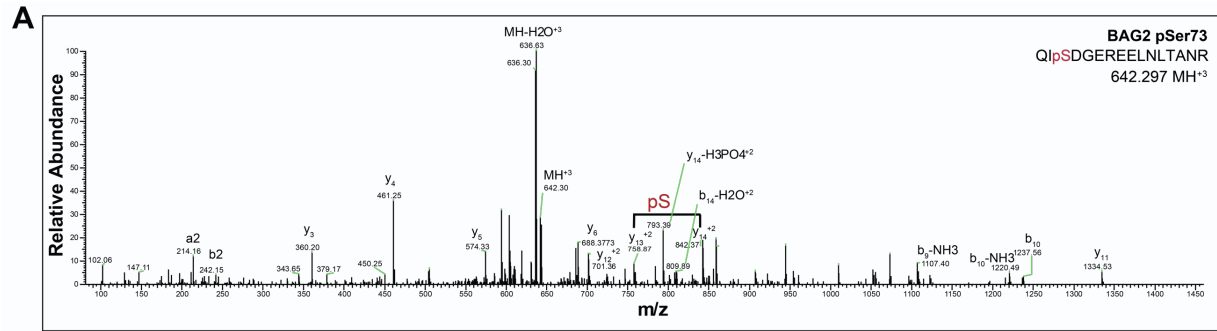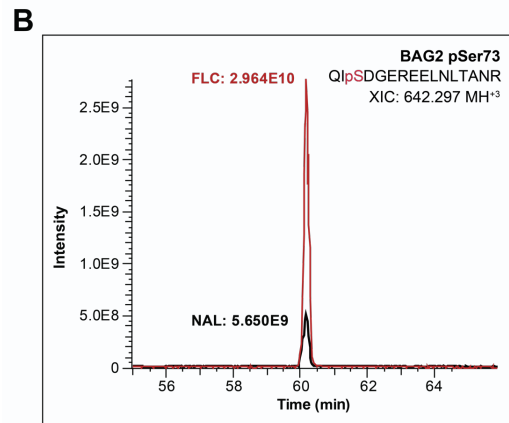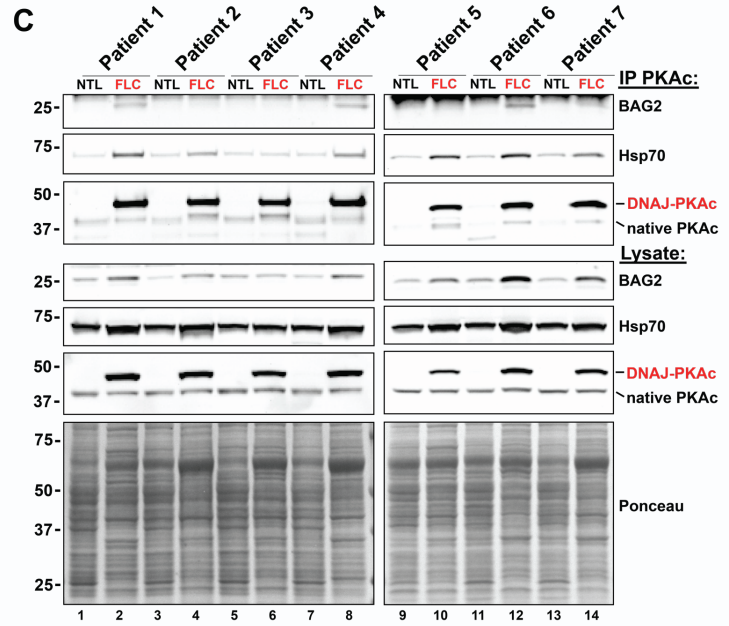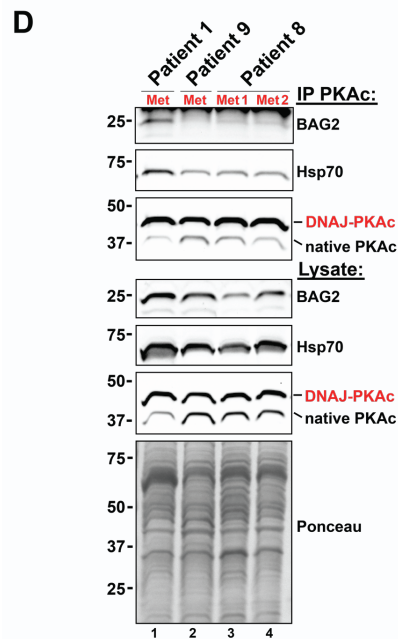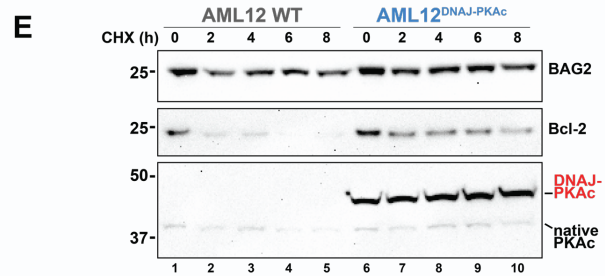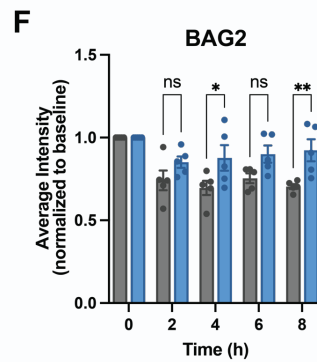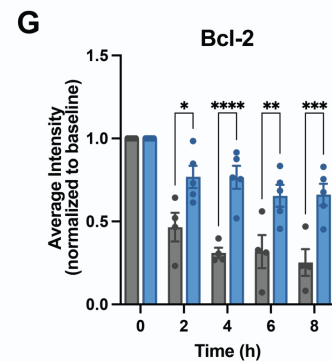

**Figure S4. BAG2 phosphorylation and stability is enhanced in the presence of DNAJ-PKAc, related to Figure 5**

- A) MS2 spectrum of BAG2 pSer73 phosphopeptide. An Orbitrap-HCD MS2 spectrum of BAG2 phosphopeptide QIpSDGEREELNLTANR (+3) is labeled with fragment ions localizing the phosphoserine residue.
- B) Extracted ion chromatograms of BAG2 pSer73 phosphopeptide. The ion chromatograms for the triply charged BAG2 phosphopeptide were extracted from LC-MS runs from FLC (red) and normal adjacent liver (NAL; black). Peak areas were determined using the ICIS peak detection algorithm in FreeStyle 1.8SP2 (Thermo Fisher). The data shows that BAG2 pSer73 phosphopeptide is up 5.2 fold in FLC over normal.
- C) Immunoprecipitation with antibody against PKAc from paired normal adjacent liver (NNT) and FLC tumor (FLC) tissue lysates from 7 patients.
- D) Immunoprecipitation with antibody against PKAc from tumor tissue lysates of four metastatic (Met) recurrences across 3 patients.
- E) Immunoblot detection of BAG2 and Bcl-2 following cycloheximide (CHX) treatment. AML12 WT (lanes 1-5) and AML12<sup>DNAJ-PKAc</sup> (lanes 6-10) cell lysates were harvested at 0, 2, 4, 6, and 8 hours post-CHX treatment. Data represents 5 experimental replicates.
- F) Quantification of (E) measuring amount of BAG2 protein remaining following CHX treatment at each time point in WT AML12 cells (grey) and AML12<sup>DNAJ-PKAc</sup> cells (blue). Data represents 4 experimental replicates. Mean  $\pm$  SEM. \*\* $p \leq 0.01$ , \* $p \leq 0.05$ .
- G) Quantification of (E) measuring amount of Bcl-2 protein remaining following CHX treatment at each time point in WT AML12 cells (grey) and AML12<sup>DNAJ-PKAc</sup> cells (blue). Data represents 5 experimental replicates. Mean  $\pm$  SEM. \*\*\*\* $p \leq 0.0001$ , \*\*\* $p \leq 0.001$ , \*\* $p \leq 0.01$ , \* $p \leq 0.05$ .
